# Supplementary material
Source: MDPI journal article supplement (https://www.mdpi.com/1424-8247/15/1/89)
Supplement: s1 [file s1]

## Supplementary method

### Cytofluorimetric analysis

The isolation of inflammatory cells from the muscle tissue for the cytofluorimetric analysis was completed through two methods:

- Method A: enzymatic digestion with Liberase TL at 0.25 mg/mL (Roche, Milan, Italy) and DNase at 0.5 mg/mL (Roche) for 3 hours followed by overnight incubation with RPMI + 10% Fetal Bovine Serum (FBS) (Euro Clone, Milan, Italy), filtration through 100 and 70 µm mesh filters (BD Bioscience, San Jose, CA, USA) and cytometric analysis (modified from Liang et al. J Imm Methods 2015) .
- Method B: enzymatic digestion using Skeletal Muscle Dissociation Kit (Miltenyi Biotec, Bologna, Italy) and filtration through 100 and 70 µm mesh filters, purification using gradient centrifugation by Percoll solution (GE Healthcare Bio-sciences, Uppsala, Sweden) and analysis.

The high number of dead cells resulting from Method A did not allow a reliable analysis of immune cell populations, while Method B proved efficient in excluding dead cells, thus providing clean results. In the manuscript we describe the mice which were analysed with Method B (WT (n=6), *Sgca* CTR (n=7) and *Sgca* A438079 (n=5)).
